# Supplementary material for: A carbon fiber ultramicroelectrode as a simple tool to direct antioxidant estimation based on caffeic acid oxidation
Source: Royal Society of Chemistry journal article supplement (doi:10.1039/d0ay01050b), 2020-01-01
Supplement: d0ay01050b1.pdf [file d0ay01050b1.pdf]

## Supplementary material

*Carbon Fiber Ultramicroelectrode as a simple tool to direct Antioxidant estimation based on caffeic acid oxidation*

Ava Gevaerd, Bruna Medeiros da Silva, Paulo Roberto de Oliveira, Luiz Humberto Marcolino Júnior, Márcio Fernando Bergamini

**Figure S1:** Schematic representation of CF-UME construction.

**Figure S2:** Images of the final CF-UME. A) Before sealing, B) After sealed, and C) Front view after being sealed.

**Figure S3:** Representative SEM images of Carbon Fibers used for UME construction.

**Figure S4:** EDS spectra obtained for Carbon Fiber.

**Figure S5:** Comparison between the behavior of GCE and CF-UME under A) Chronoamperometric study, B) Voltammetric profile for GCE, and C) Voltammetric profile for CF-UME.

**Figure S6:** A) Voltammograms obtained for concomitant study; B) Current variation graph obtained for the concomitant study.  $C_{\text{HAF}} = 100 \mu\text{mol L}^{-1}$ ;  $C_{\text{CONC}} = 100 \mu\text{mol L}^{-1}$

Figure S1

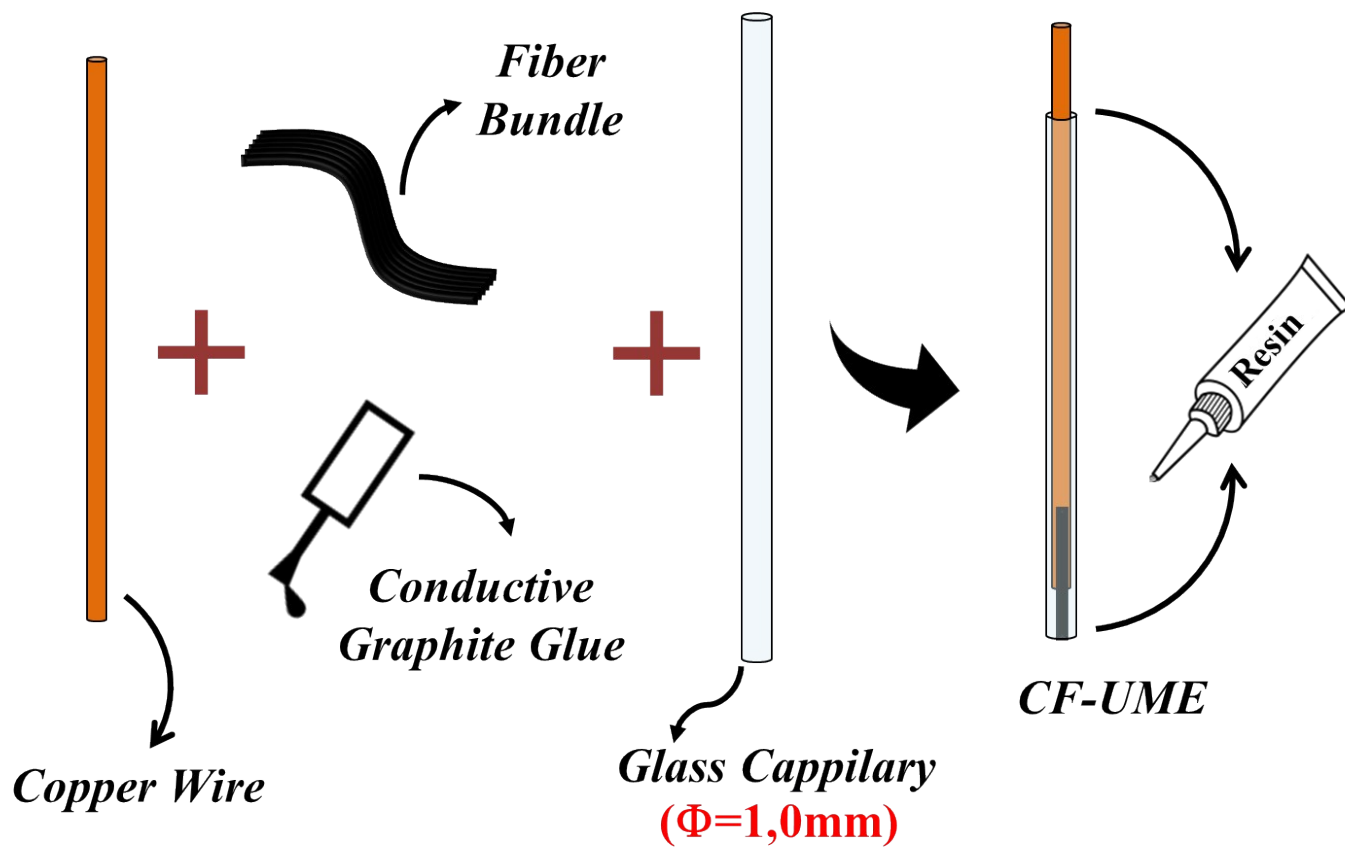

Figure S1. Schematic representation of CF-UME construction.

**Figure S2**

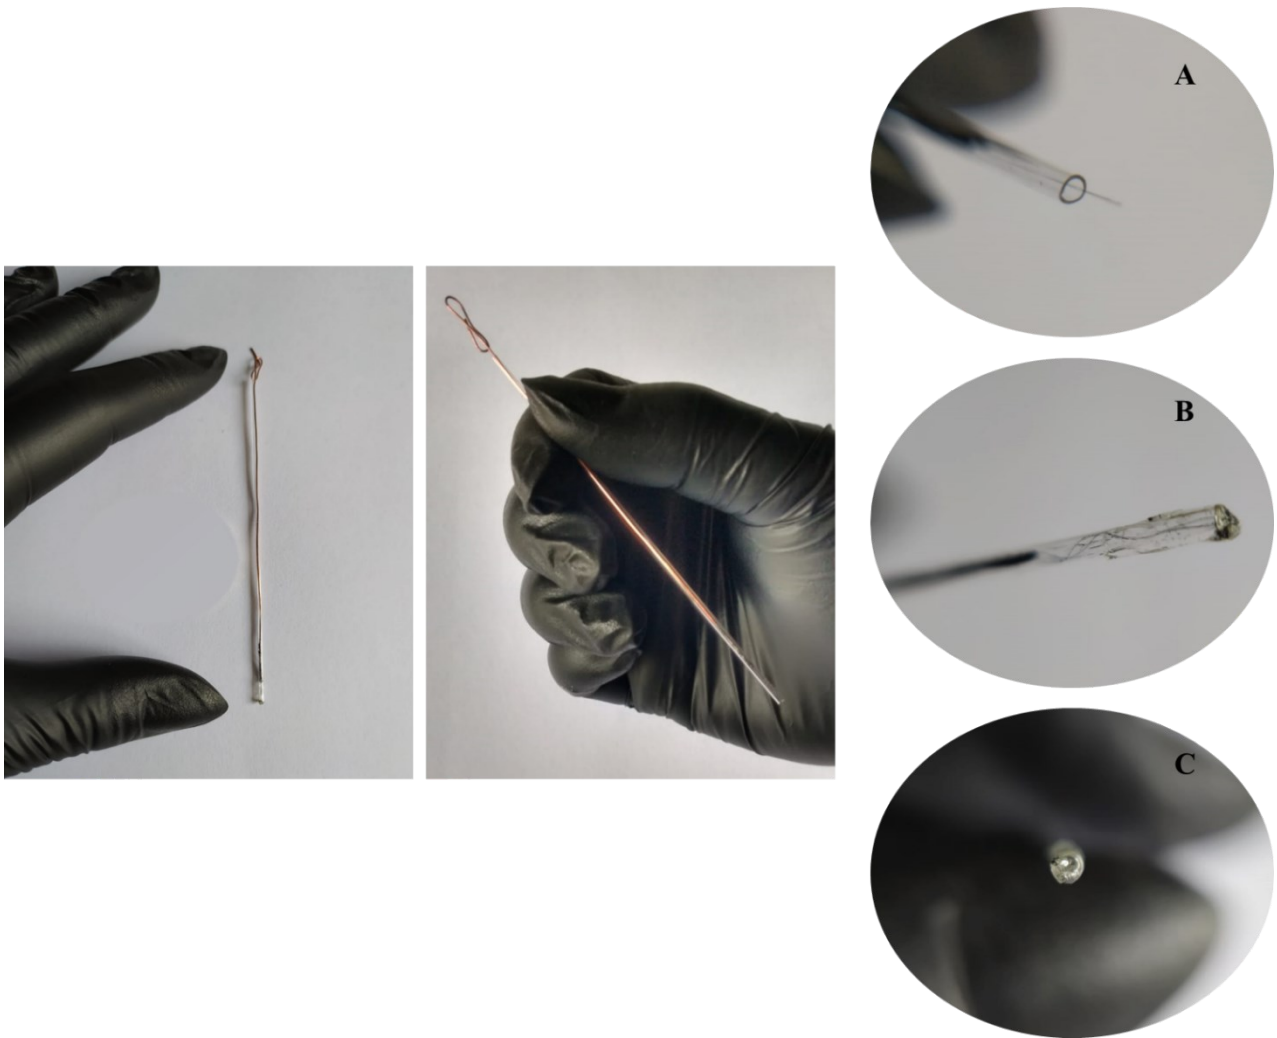

**Figure S2.** Images of the final CF-UME. A) Before sealing, B) After sealed, and C) Front view after being sealed.

FIGURE S3

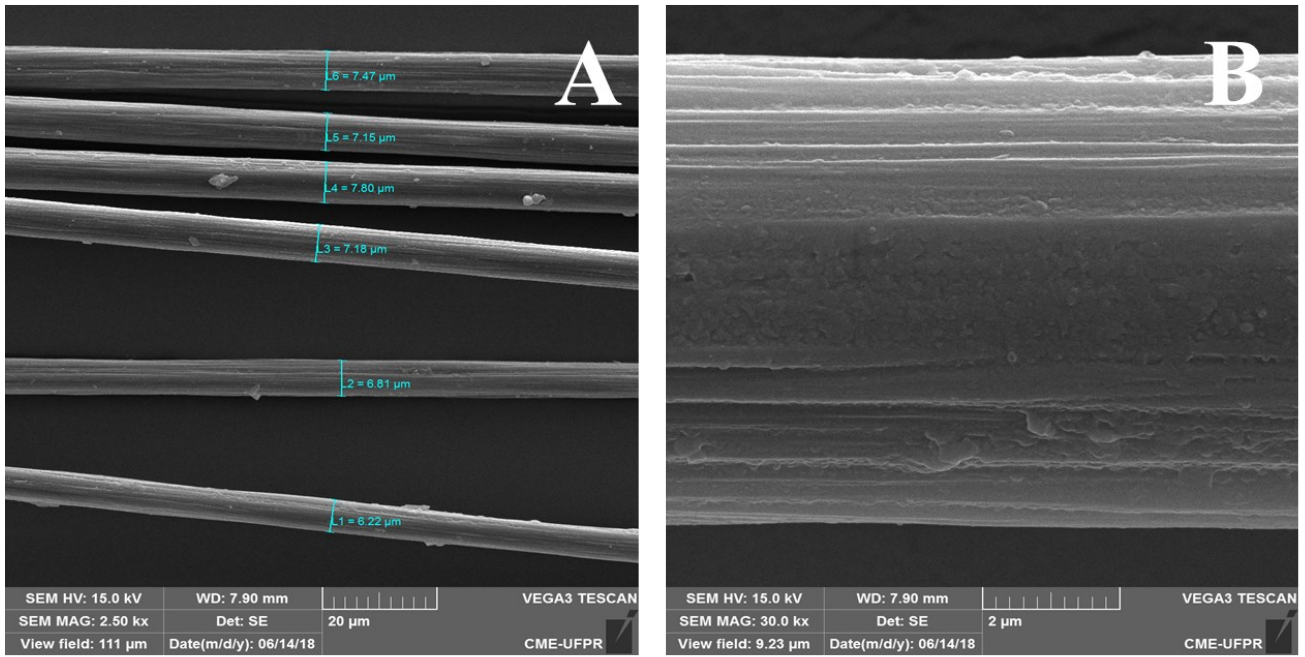

Figure S3. Representative SEM images of Carbon Fibers used for UME construction.

FIGURE S4

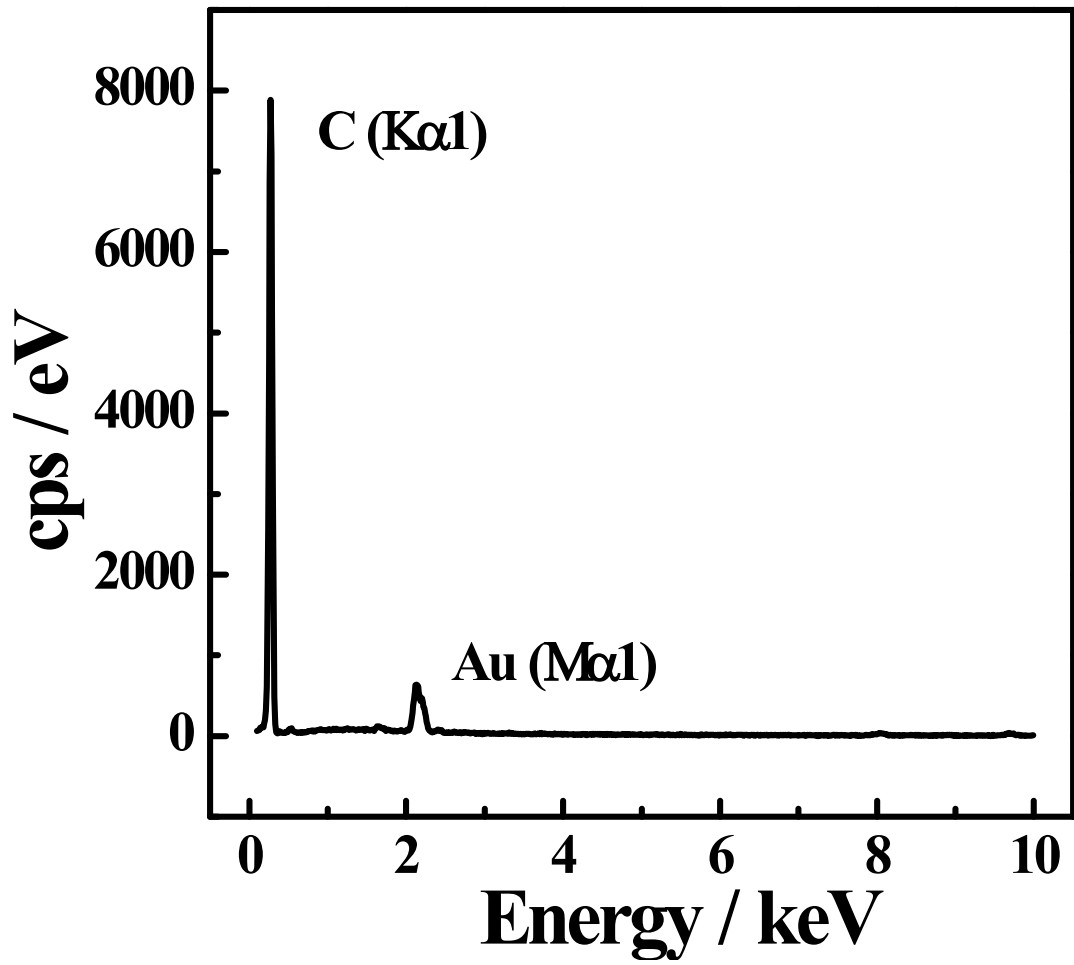

Figure S4. EDS spectra obtained for Carbon Fiber.

FIGURE S5

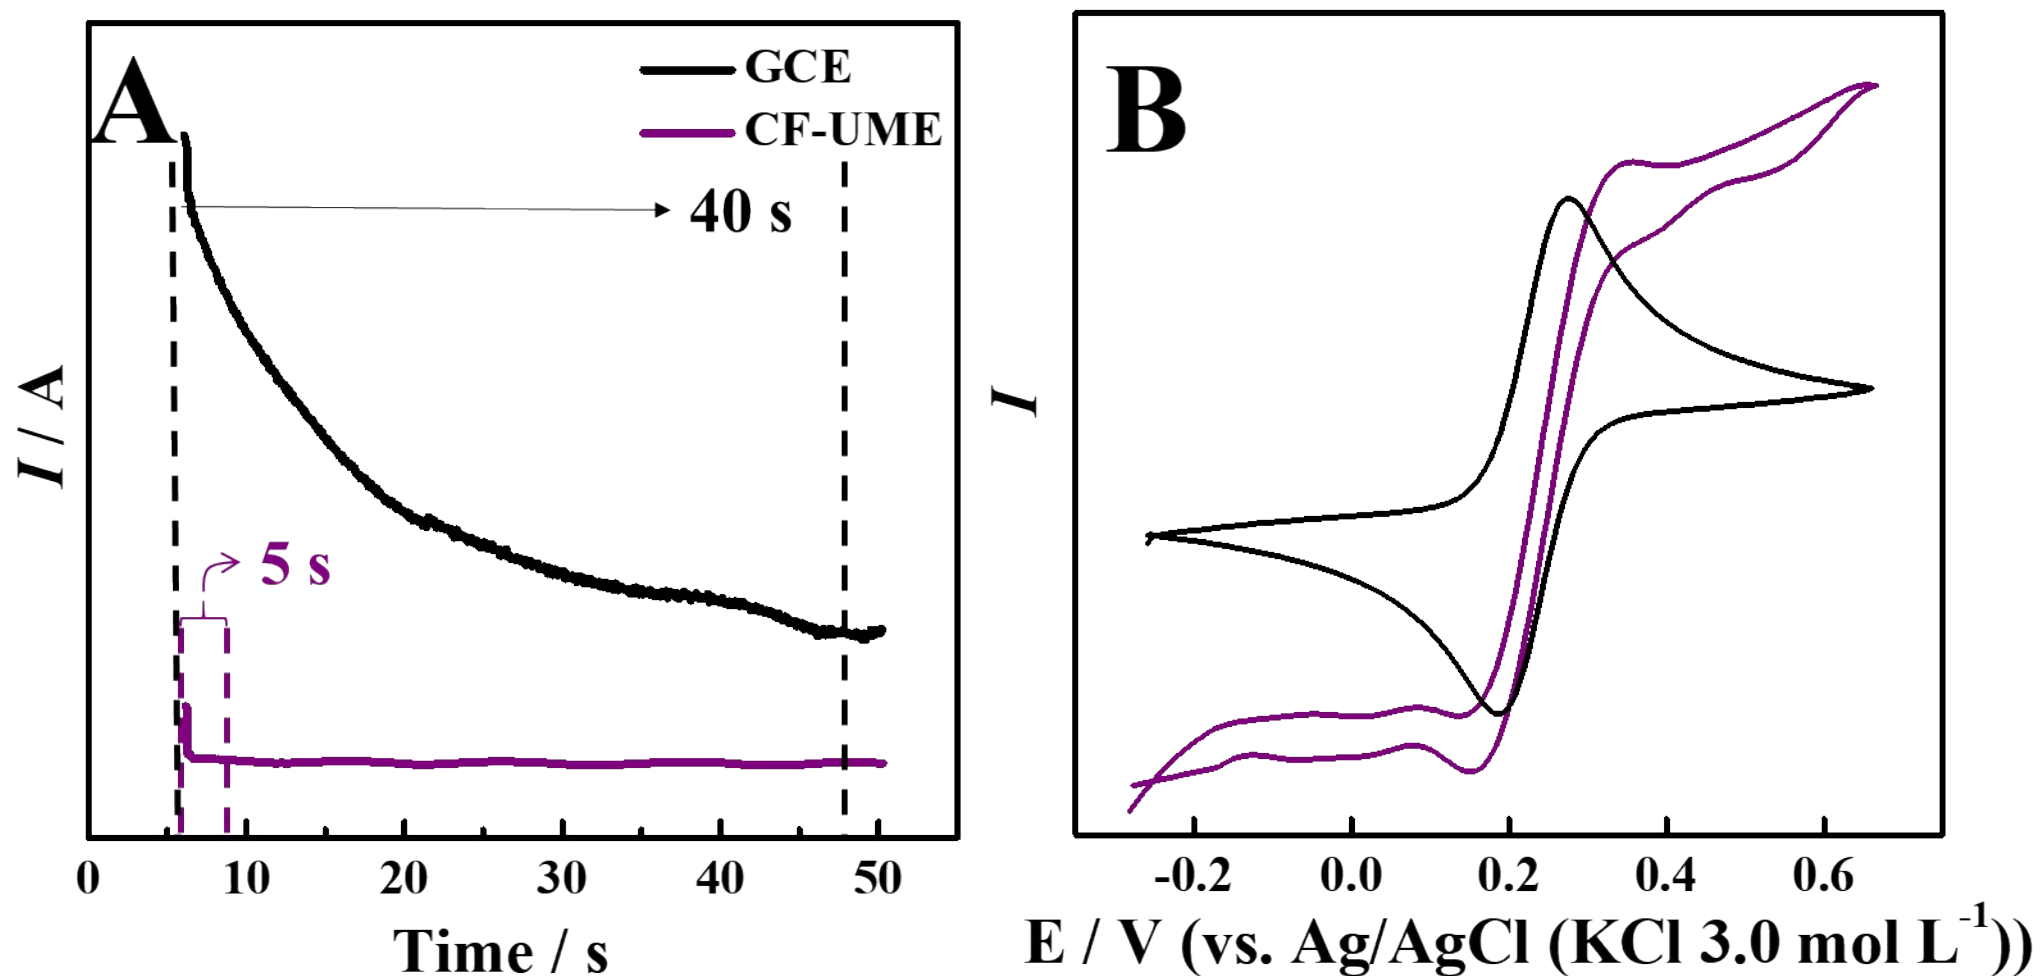

**Figure S5.** Comparison between the behavior of GCE and CF-UME under A) Chronoamperometric study, B) Voltammetric profile for GCE, and C) Voltammetric profile for CF-UME.

FIGURE S6

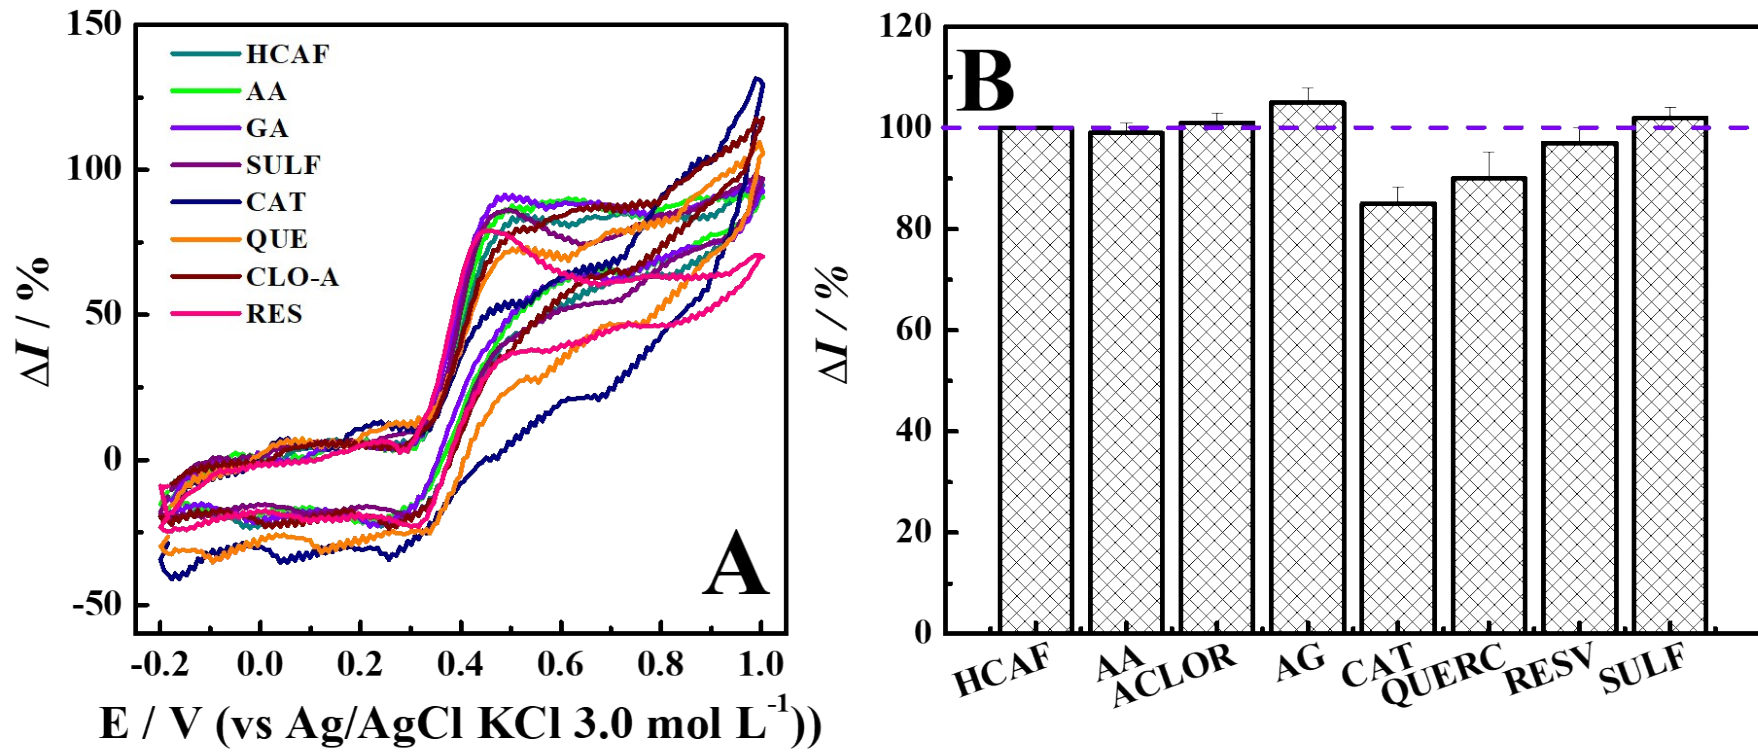

**Figure S6.** A) Voltammograms obtained for concomitant study; B) Current variation graph obtained for the concomitant study.  $C_{\text{HCAF}} = 100 \mu\text{mol L}^{-1}$ ;  $C_{\text{CONC}} = 100 \mu\text{mol L}^{-1}$
